# Supplementary material for: Evolution of digital organisms at high mutation rates leads to survival of the flattest
Source: Springer Nature journal article supplement (doi:10.1038/35085569), 2001-07-01
Supplement: 41586_2001_BF35085569_MOESM1_ESM.pdf [file 41586_2001_BF35085569_MOESM1_ESM.pdf]

## Supplementary Information for “Evolution of digital organisms at high mutation rate leads to survival of the flattest”.

Equation (1) was chosen because it described well the empirically observed decay of the mean fitness as a function of the mutation rate. The following calculation, due to Peter Schuster (University of Vienna), shows that an equation of the same form can be derived from the quasi-species model [1,2].

In mutation-selection equilibrium, the average fitness  $w(\mu)$  of a population consisting of a master sequence  $I_0$  and its mutants is given to second order by [2,3]

$$w(\mu) = W_{00} + \sum_{k \neq 0} \frac{W_{0k}W_{k0}}{W_{00} - W_{kk}}, \quad (*)$$

where  $\mathbf{W} = \{W_{ij}; i, j = 0, \dots, n\}$  is the matrix of selective values and mutation probabilities, and it is assumed that the master sequence  $I_0$  has  $n$  different possible mutants. In our experiments with digital organisms, mutations arise with a uniform probability  $R = \mu/L$  per site, and hence the elements of the matrix  $\mathbf{W}$  are of the form

$$W_{ik} = w_k \epsilon^{d(i,k)} (1 - R)^L,$$

where the replication rate of genotype  $k$  is given by  $w_k$ ,  $L$  is the sequence length,  $d(i, k)$  is the Hamming distance between the two genotypes  $i$  and  $k$ , and the quantity  $\epsilon = R/[(1 - R)(\kappa - 1)]$  is the modified mutation rate, with  $\kappa$  being the cardinality of the genetic alphabet ( $\kappa = 4$  for the natural alphabet, **AUGC**, and  $\kappa = 28$  in the case of these digital organisms).

In the following, all terms of order higher than  $R^2$  will be ignored. In the sense of a mean field approximation, we represent all single-site mutants of the master sequence by their mean replication rate  $w_{(1)}$  and by the difference of their mean replication rate to the replication rate of the master sequence,  $\Delta w_{(1)} = w_0 - w_{(1)}$ . Here, the subscript “(1)” refers to the family of all sequences that differ from the master sequence by exactly one mutation. Noting that there are  $L(\kappa - 1)$  different single-site mutants, equation (\*) becomes

$$w(\mu) = w(RL) = w_0(1 - R)^L \left[ 1 + \frac{Lw_{(1)}}{(\kappa - 1)\Delta w_{(1)}} \left( \frac{R}{1 - R} \right)^2 \right].$$

Expansion in a power series of the mutation rate  $\mu$  yields:

$$w(\mu) = w_0 \left[ 1 - \mu + \left( \frac{L - 1}{2L} + \frac{w_{(1)}}{L(\kappa - 1)\Delta w_{(1)}} \right) \mu^2 + O(\mu^3) \right]. \quad (**)$$

Likewise, equation (1) can be expanded into

$$w(\mu) = w_0 \left[ 1 - a\mu + \left( \frac{a^2}{2} - b \right) \mu^2 + O(\mu^3) \right]. \quad (***)$$

A comparison between equations (\*\*) and (\*\*\*) reveals two conditions on the parameters  $a$  and  $b$ : (i)  $a^2/2 > b$ , since the coefficient in front of  $\mu^2$  in equation (\*\*) is always positive, and (ii)  $a \lesssim 1$ , because from  $\mu = LR$  follows that  $aL$  gives a measure for the effective genome length of the organism.

We compared  $a$  and  $b$  in all 24 organisms that we studied, and found criterion (i) satisfied in all but 3 cases. We cannot expect complete agreement between the theory and our measurements, for the following reasons. First, the derivation of equation (\*\*) assumes equilibrium. We have, however, measured the mean population fitness after fifteen generations, in order to obtain a result with predictive value for the (short-term) competition experiments. Fifteen generations do not guarantee full equilibration of the quasi-species. Second, if there is a strong disparity between the one-mutant replication rates, where some are almost neutral (i.e., have almost identical replication rate to the master sequence) while others replicate much slower, the mean field approximation that led to equation (\*\*) may not be justified. From earlier studies [4], we know that such a disparity among the one-mutants does indeed exist. Regarding criterion (ii), we observed that  $a < 1$  in sixteen cases, whereas  $a > 1$  in eight others. In principle,  $a > 1$  implies an effective genome length greater than the actual length, which is difficult to comprehend. However, it must be emphasized that these values were obtained by fitting a two-parameter model,  $\exp(-a\mu - b\mu^2)$ , to empirical data. In all cases with  $a > 1$ , the decay initially accelerated with increasing  $\mu$ , but then slowed down, so that the curve fitting tended to overestimate parameter  $a$  and underestimate  $b$ . Despite such subtle discrepancies, the measured fitness functions  $w(\mu)$  agree well with the quasi-species theory.

## References

- [1] Eigen, M. & Schuster, P. The hypercycle. A principle of natural self-organization. Part A: Emergence of the hypercycle. *Naturwissenschaften*, **64**, 541–565 (1977).
- [2] Eigen, M., McCaskill, J. & Schuster, P. The molecular quasispecies. *Adv. Chem. Phys.*, **75**, 149–263 (1989).
- [3] Schuster, P. & Swetina, J. Stationary mutant distribution and evolutionary optimization. *Bull. Math. Biol.*, **50**, 635–660 (1988).
- [4] Lenski, R. E., Ofria, C., Collier, T. C. & Adami, C. Genome complexity, robustness and genetic interactions in digital organisms. *Nature* **400**, 661–664 (1999).
